# Supplementary material for: Development of a 31P magnetic resonance spectroscopy technique to quantify NADH and NAD+ at 3 T
Source: PubMed Central journal article supplement — Nat Commun. 2024 Oct 24;15:9159. doi: 10.1038/s41467-024-53292-4 (PMC11499639; doi:10.1038/s41467-024-53292-4), 2024-10-24
Supplement: 41467_2024_53292_MOESM1_ESM.pdf [file 41467_2024_53292_MOESM1_ESM.pdf]

## Supplementary

**Table S1:**

Pulse shapes, durations etc.:

| <b>Pulse Shape</b>                        | <b>Duration in ms</b> |
|-------------------------------------------|-----------------------|
| Adiabatic half passage: hs_ex_500_400_100 | 4.652                 |
| Adiabatic full passage: oit_800_6500      | 3.4620                |
| Block 90                                  | 0.096                 |

**Suppl table S2:***Composition of NADH, NAD<sup>+</sup> and ATP phantoms in 200ml stackable cell culture bottle*

| <b>Metabolite</b> | <b>Concentration in mM</b> | <b>Additives</b>                                                                 | <b>pH</b> |
|-------------------|----------------------------|----------------------------------------------------------------------------------|-----------|
| NADH              | 0.875                      |                                                                                  | 6.0       |
|                   | 1.75                       | 52.6 mM KCl, 42.3 mM MgCl <sub>2</sub>                                           | 6.0       |
|                   | 3.5                        |                                                                                  | 6.0       |
| NAD <sup>+</sup>  | 0.875                      |                                                                                  | 6.0       |
|                   | 1.75                       | 52.6 mM KCl, 42.3 mM MgCl <sub>2</sub>                                           | 6.0       |
|                   | 3.5                        |                                                                                  | 6.0       |
| ATP               | 18.0                       | 52.6 mM KCl, 42.3 mM MgCl <sub>2</sub> ,<br>5 mM KH <sub>2</sub> PO <sub>4</sub> | 7.2       |

**Suppl table S3: Fitting prior knowledge:**

*Fitting prior knowledge. From reference (53), various  $T_2$  values within the 95% confidence interval were tested and the  $T_2$  that resulted in the best fit (lowest residual) was chosen for further implementation. Furthermore,  $T_2$  values for NADH and  $NAD^+$  were assumed to be similar to the  $T_2$  of ATP (28) and further optimization showed that a slightly shorter  $T_2$  for  $NAD^+$  resulted in a better fit (less residual) which is the basis for the prior knowledge as given in the table. The same prior knowledge was used for all in vivo measurements*

| <b>Fitted Metabolite</b> | <b>Assumed <math>T_2</math> in ms</b> | <b>Source</b> | <b>Relative Chemical Shift at 3T in Hz</b> | <b>Source</b> |
|--------------------------|---------------------------------------|---------------|--------------------------------------------|---------------|
| Pi                       | 148                                   | (53)          | -258.5                                     | (16)          |
| GPE                      | 44                                    |               | -165.46                                    |               |
| GPC                      | 28                                    |               | -142.71                                    |               |
| PCr                      | 334                                   |               | 0.0                                        |               |
| $\gamma$ -ATP            | 62                                    |               | 128.23                                     |               |
| $\alpha$ -ATP            | 47                                    |               | 388.82                                     |               |
| NADH                     | 42                                    | Estimation    | 425.85                                     | (15)          |
| $NAD^+$                  | 35                                    | 437.59        |                                            |               |
| $\beta$ -ATP             | 55                                    | (53)          | 835.0                                      | (16)          |
